1 **Climate change and environmental influence on visceral leishmaniasis in West Pokot**  
2 **county, Kenya**

3

4 **Climate change and visceral leishmaniasis in perspective**

5

6 Bulle Abdullahi<sup>1</sup>, Joshua Mutiso<sup>2</sup>, Fredrick Maloba<sup>2</sup>, John Macharia<sup>2</sup>, Mark Riongoita<sup>3</sup>, Michael  
7 Gicheru<sup>2</sup>.

8

9 <sup>1</sup>Department of Community Health and Epidemiology, School of Public Health, Kenyatta  
10 University, Nairobi, Kenya

11

12 <sup>2</sup>Department of Zoological Science, School of Pure and Applied Science, Kenyatta University,  
13 Nairobi, Kenya

14

15 <sup>3</sup>Ministry of Health, West Pokot County, Kenya

16

17

18 Corresponding author

19 Email: bulle07@hotmail.co.uk (BA)

20 <https://orcid.org/0000-0001-7619-206X>

21

22

## 23 Abstract

24 Kala-azar is a parasitic disease caused by *Leishmania species* transmitted by sand fly. In Kenya,  
25 kala-azar is endemic in thirty sub-counties spread over in eleven counties in the arid zones.  
26 Climate change-influenced seasonal weather variability and environmental alterations remain  
27 important determinants of many vector-borne diseases. The present study focused on climate  
28 change and environmental influence on kala-azar in West Pokot. Descriptive cross-sectional and  
29 retrospective research design was adapted. Study area was purposively selected. Locations and  
30 villages were randomly selected, while households were systematically selected. Three hundred  
31 sixty three household questionnaires, eleven key informant interviews, and five focus group  
32 discussions were undertaken. Secondary data was obtained from Kacheliba sub-county hospital  
33 records. Statistical package for social science version 24 was used to analyze quantitative data  
34 while NVivo software was used to analyse qualitative data. Kala-azar cases have been on the rise  
35 on aggregate from 2010 to 2020, 400 to 500 annual average cases, and incident rate tends to  
36 surge during dry season and just after the rains when humidity is high and temperature variations  
37 are wide. Significant environmental characteristics associated with risk of kala-azar infection  
38 included: presences of seasonal rain water pathways and rock piles around houses ( $X^2= 30.706$ ,  
39  $df=1$ ,  $p<0.001$ ); presence of acacia trees in and around homesteads ( $X^2=21.404$ ,  $df=1$ ,  $p<0.001$ );  
40 presence of dumping site ( $X^2=9.641$ ,  $df=1$ ,  $p=0.002$ ); presence of anthills around the homesteads  
41 ( $X^2=16.538$ ,  $df=1$ ,  $p<0.001$ ); presence of animal shed ( $X^2=4.290$ ,  $df=1$ ,  $p=0.038$ ); presences of  
42 chicken shelter ( $X^2=36.862$ ,  $df=1$ ,  $p<0.001$ ); and practices of frequently moving houses to new  
43 temporary compound ( $X^2=20.919$ ,  $df=1$ ,  $p<0.001$ ). Climate change-induced seasonal weather  
44 variability; increased temperature and reduced precipitation and environmental alterations  
45 remain significant predictors of kala-azar in West Pokot. Community sensitization on disease

46 prevalence, clearing of vector predilection sites and improving community environmental risk  
47 perception are imperative to promote prevention and reduce disease burden.

48

49 **Keywords:** kala-azar, household, environment, climate change, sand fly, vector.

50

### 51 **Brief summary**

52 Climate change and environmental alteration influence on vector-borne diseases is getting  
53 stronger as ever increasing global temperatures and human activity-induced environmental  
54 changes remain key drivers of vector expansion and disease re-emergence. In Kenya, kala-azar  
55 cases are on an increasing trend as annual incidents surpassed 1,500 with a growing list of over  
56 eleven endemic counties. The present study used household questionnaire, interrogated  
57 surrounding environment using observation checklist and delved into Kacheliba hospital records.  
58 Risk of kala-azar was significant in association with presence of seasonal water pathways,  
59 presence of acacia trees, anthills, cattle & goat and chicken shelters around houses. On  
60 aggregate, kala-azar incident rate was increasing from 2010 to 2020, and cases tend to surge  
61 towards end of first and start of last quarter annually. These surge periods coincide with dry  
62 season and just after rains in the area when the humidity is high. Apparently during the last 10  
63 years there seems reduced precipitation and increase temperature. Interestingly, increased in  
64 temperature and reduced precipitation was associated with increased reported Kala-zar cases.  
65 Policy makers and concerned agencies should consider promoting preventive behaviors,  
66 increasing community risk perception and eliminating vector-harboring structures around houses,  
67 while observing environmental conservation as a disease mitigation strategy.

## 68 **1. Introduction**

69 Leishmaniasis is a vector borne protozoan re-emerging disease caused by *Leishmania species*  
70 and transmitted by sand fly vectors [1,2]. Leishmaniasis is a neglected disease receiving little  
71 development and research investments, thus, considered as a disease of poverty as majority of its  
72 victim's are people with humble economical background who reside at the periphery of global  
73 villages where basic resources like health are limited [3,4]. Leishmaniasis has four major disease  
74 forms which range from simple skin lesions to fatal systemic infection and include: cutaneous  
75 form, visceral form, muco-cutaneous form, and post kala-azar dermal leishmaniasis form [5,6].  
76 Visceral leishmaniasis is considered most lethal among all the forms with over 95% fatality rate  
77 if untreated and second most killer parasitic disease after malaria [4,7,8]. Although only 25-45%  
78 of the incidents are reported, visceral leishmaniasis is endemic in over hundred countries  
79 worldwide and more than ninety percent of the cases occur in ten countries mainly in Eastern  
80 Africa, South-East Asia region, and Brazil [4]. Globally, visceral leishmaniasis is causing more  
81 than 50,000 fatalities, over one million cases, and more than 350 million people are at risk  
82 [9,10].

83 After the Indian sub-continent, Eastern Africa is considered to be contributing second most  
84 highest number of visceral leishmaniasis cases and they are mainly caused by *Leishmania*  
85 *donovani* [11,12]. In Kenya, visceral leishmaniasis was first documented in early 19<sup>th</sup> century  
86 when an outbreak occurred around Lake Turkana area [13]. Currently in Kenya, visceral  
87 leishmaniasis is endemic in over eleven counties which are reporting approximately 1,500 cases  
88 annually, and more than five million people are at risk of this disease mostly in the arid and  
89 semi-arid climatic zone [5,14,15]. Considering the fast setting-in of climate change effect which  
90 triggers frequent alterations on seasonal weather pattern, both the global prevalence and

91 emergence of vector borne diseases in uncommon areas is expected to rise [16]. Regardless of  
92 *phlebotomine species* involved and reservoir behaviors, weather fluctuations and environmental  
93 modifications are considered strong determinants of leishmaniasis [17,18]. Similarly, global  
94 warming and climate change-induced alteration in temperature and precipitations variability  
95 remains to be significant predictors in vector epidemiology in terms of abundances and  
96 activeness [19]. In African where more than seventy percent of the population lives in rural  
97 areas, it is expected that the continent will experience more of the effect of climate change and  
98 global warming as a result of the emerging new settlements and widespread alteration of  
99 environment through deforestation which may promote creation of more vector breeding sites  
100 [20]. Increase in temperature is believed to favor sand fly multiplication while also increasing its  
101 period of activity [21]. Environmental factors surrounding homesteads including presences of  
102 certain plant species, seasonal rain water pathways-created land fissure and crevices, presences  
103 of animal sheds, and chicken houses are thought to influence the presence as well as activity of  
104 the vector [2,18].

105 The devastating effect of global warming and climate change coupled with prevalent low  
106 individual immune system and social weakness in the visceral leishmaniasis endemic zones,  
107 cases of leishmaniasis are expected to get aggravated, thus, the need to undertake  
108 epidemiological studies particularly in endemic areas [22–24]. The study aimed to contribute to  
109 the sustainable development goal number 3.3, World Health Organization’s neglected tropical  
110 diseases road map target 2021 to 2030, as well as Kenya’s ministry of health 2021-2025 strategic  
111 plan for control of visceral leishmaniasis and vision 2030. The present study endeavors to  
112 ascertain climate change and environmental influence on visceral leishmaniasis in West Pokot

113 county in order to provide essential information to help in up-scaling strategies to reduce visceral  
114 leishmaniasis burden.

115

## 116 **2. Materials and methods**

117 **Study area.** The current study was carried out from September 2020 to February 2021 in West  
118 Pokot county and particularly in Pokot north sub-county. The sub-county has 3,910 km<sup>2</sup> land  
119 mass and is home to 134,485 persons [25]. The area experiences temperature of 20 °c to 39°c and  
120 mostly seasonal rainfall of approximately 500 mm. Pokot north borders with Turkana county to  
121 the north and east and international border with Uganda to the west.

122 **Study design.** The study combined both descriptive cross-sectional and retrospective study  
123 design aimed at establishing climate change and environmental alterations-induced seasonal  
124 weather variability influence on visceral leishmaniasis burden from 2010 to 2020 in West Pokot  
125 county.

126 **Sampling.** The study area was selected purposively considering the high number of kala-azar  
127 cases reported and presence of visceral leishmaniasis treatment and diagnostic centre in the study  
128 area. Random sampling of locations and villages, and systematic selection of household that  
129 lived in the area for more than six months was undertaken. Three hundred sixty three household  
130 questionnaires and observation checklist, eleven key informant interviews, and five focus group  
131 discussions were carried out as well as secondary data obtained from Kacheliba hospital records.  
132 Historical Kacheliba temperature and rainfall amount obtained from world weather online was  
133 used as weather parameter. Sample size was determined by using Cochran's  $n = Z^2Pq/e^2$ .

134 **Data analysis.** Statistical Package for the Social Sciences (SPSS) version 24 and Microsoft excel  
135 software were used to analyse quantitative data, and chi-square was used to test for the level of  
136 association between variables. Qualitative data was analysed using NVivo software to establish  
137 connection and interpretation in identification of patterns. Correlation analysis between the  
138 disease burden and temperature or rainfall amount was done using Pearson correlation test. Only  
139 variables with P-value of less than 0.05 were considered significant.

140

### 141 **3. Results**

#### 142 **3.1 Environmental characteristics of household respondents**

143 Table 1 describes distribution of environmental characteristics that were considered significant in  
144 influencing the risk of visceral leishmaniasis in the study area. More than half (53.1%) of the  
145 respondents had seasonal rain water pathways or rock piles existing around their homesteads  
146 while 46.9% had none of these in close proximity. Almost three quarters of the participants  
147 (74.7%) had acacia trees present in and around their compounds while about a quarter (25.7%)  
148 had either uprooted or lived in areas where this tree species was not common. A considerable  
149 percentage (37.5%) of respondents had garbage dumping sites present within fifty meters  
150 proximity to their houses, while the majority (62.5%) reported to dispose waste haphazardly in  
151 their farm fields and surrounding community rangeland fields. Majority (81.7%) of the study  
152 participants had anthills present in and around their compounds, while few (18.3) had either  
153 removed them or naturally the anthills were not common in their area of residence. More than  
154 (80%) of the respondents had constructed animal sheds and chicken shelters within their  
155 compounds. Considering traditional practice of moving houses to temporary new compounds,

156 small percentage (29.2%) of respondents reported to be practicing traditional nomadic habit of  
 157 frequently moving houses from time to time and to different locations.

158 **Table 1: Household response to environmental characteristics in Pokot north sub-**  
 159 **county of West Pokot County, Kenya (N=360)**

| Variable                                   | Category | n   | %    |
|--------------------------------------------|----------|-----|------|
| Seasonal water pathways/rock pile presence |          |     |      |
|                                            | Yes      | 191 | 53.1 |
|                                            | No       | 169 | 46.9 |
| Acacia tree presence                       |          |     |      |
|                                            | Yes      | 269 | 74.7 |
|                                            | No       | 91  | 25.3 |
| Dumping site presence                      |          |     |      |
|                                            | Yes      | 135 | 37.5 |
|                                            | No       | 225 | 62.5 |
| Anthill presence                           |          |     |      |
|                                            | Yes      | 294 | 81.7 |
|                                            | No       | 66  | 18.3 |
| Animal shed presence                       |          |     |      |
|                                            | Yes      | 291 | 80.8 |
|                                            | No       | 69  | 19.2 |
| Chicken shelter presence                   |          |     |      |
|                                            | Yes      | 318 | 87.8 |
|                                            | No       | 40  | 12.2 |
| Recently moved house                       |          |     |      |
|                                            | Yes      | 105 | 29.2 |
|                                            | No       | 255 | 70.8 |

160

161

162 **3.2 Household respondent environmental characteristics and association with visceral**  
 163 **leishmaniasis**

164 Cross-tabulation result in Table 2 on environmental characteristics and visceral leishmaniasis  
 165 prevalence indicate that risk was high 33% (n=63) among those homesteads near seasonal rain  
 166 water pathways and rock piles, and among those having acacia trees 27.5% (n=74) within their



167 compounds. Similarly, higher occurrence of visceral leishmaniasis was observed among those  
168 households with dumping sites present 30.4% (n=41) approximately within fifty meters to the  
169 houses, and among those with presence of anthills 25.9% (n=76) in and around their compounds.  
170 The disease was also more prevalent among those households with constructed animal sheds  
171 24.1% (n=70), and chicken shelters 17% (n=53) in and around their compound. Significant  
172 percentage 37.1% (n=39) among those who practiced moving houses from time to time to new  
173 temporary compounds also appeared to be at higher risk of visceral leishmaniasis compared to  
174 those who lived in permanent compounds 15.3% (n=39).

175 The result in Table 2 further indicates that there is statistically significant association between  
176 risk of visceral leishmaniasis among respondents and presence of seasonal rain water pathway  
177 and rock piles around the compound ( $X^2= 30.706$ ,  $df=1$ ,  $p<0.001$ ). Presence of acacia trees in the  
178 compound and surroundings was also significantly associated with higher risk of infection ( $X^2=$   
179  $21.40$ ,  $df=1$ ,  $p<0.001$ ). Presence of garbage dumping site approximately fifty meters to the house  
180 was statistically associated with increased risk of exposure to disease ( $X^2= 9.641$ ,  $df=1$ ,  
181  $p<0.002$ ). Existence of anthills in and around the compound was also significant in relation to  
182 risk of visceral leishmaniasis infection ( $X^2=16.538$ ,  $df=1$ ,  $p<0.001$ ). Presences of constructed  
183 animal sheds and chicken shelters around the houses was significantly associated with risk of  
184 infection ( $X^2=5.103$ ,  $df=1$ ,  $p=0.024$ ) and ( $X^2=36.862$ ,  $df=1$ ,  $p<0.001$ ) respectively. Risk of  
185 visceral leishmaniasis was also significant among those who practice nomadic habit of moving  
186 houses to new temporary compounds and locations from time to time ( $X^2=20.919$ ,  $df=1$ ,  
187  $p<0.001$ ; Table 2).

188

189 **Table 2: Household respondent environmental characteristics and association with visceral**  
 190 **leishmaniasis in Pokot north sub-county of West Pokot county, Kenya (n=360)**

| Variable                          | Category | Visceral leishmaniasis present |            |            | X <sup>2</sup> | df. | p-value |
|-----------------------------------|----------|--------------------------------|------------|------------|----------------|-----|---------|
|                                   |          | Yes                            | No         | Total      |                |     |         |
| Water pathways/rock pile presence |          |                                |            |            |                |     |         |
|                                   | Yes      | 63(17.5%)                      | 128(35.6%) | 191(53.1%) | 30.706         | 1   | <0.001  |
|                                   | No       | 15(4.2%)                       | 154(42.8%) | 169(46.9%) |                |     |         |
| Acacia tree presence              |          |                                |            |            |                |     |         |
|                                   | Yes      | 74(20.6%)                      | 195(54.2%) | 269(74.7%) | 21.404         | 1   | <0.001  |
|                                   | No       | 4(1.1%)                        | 87(24.2%)  | 91(25.3%)  |                |     |         |
| Dumping site presence             |          |                                |            |            |                |     |         |
|                                   | Yes      | 41(11.4%)                      | 94(26.1%)  | 135(37.5%) | 9.641          | 1   | 0.002   |
|                                   | No       | 37(10.3%)                      | 188(52.2%) | 225(62.5%) |                |     |         |
| Anthill presence                  |          |                                |            |            |                |     |         |
|                                   | Yes      | 76(21.1%)                      | 218(60.6%) | 294(81.7%) | 16.538         | 1   | <0.001  |
|                                   | No       | 2(0.6%)                        | 64(17.8%)  | 66(18.3%)  |                |     |         |
| Animal shed presence              |          |                                |            |            |                |     |         |
|                                   | Yes      | 70(19.4%)                      | 221(61.4%) | 291(80.8%) | 5.103          | 1   | 0.024   |
|                                   | No       | 8(2.2%)                        | 61(16.9%)  | 69(19.2%)  |                |     |         |
| Chicken shelter presence          |          |                                |            |            |                |     |         |
|                                   | Yes      | 53(14.6%)                      | 265(73.2%) | 318(87.8%) | 36.862         | 1   | <0.001  |
|                                   | No       | 25(6.9%)                       | 19(5.2%)   | 40(12.2%)  |                |     |         |
| Recently moved house              |          |                                |            |            |                |     |         |
|                                   | Yes      | 39(10.8%)                      | 66(18.3%)  | 105(29.2%) | 20.919         | 1   | <0.001  |
|                                   | No       | 39(10.8%)                      | 216(60.0%) | 255(70.8%) |                |     |         |

191 *spss cross-tabulation and chi-square result, vl=visceral leishmaniasis*

192  
 193 **3.3 Trends of kala-azar incident rate and temperature from the year 2010 to 2020 in**  
 194 **Kacheliba sub-county**

195 Figure 1 shows annual visceral leishmaniasis incident rates as obtained from Kacheliba sub-  
 196 county hospital records and Kacheliba sub-county annual temperature trends as obtained from  
 197 World weather online ([https://www.worldweatheronline.com/kacheliba-weather/rift-](https://www.worldweatheronline.com/kacheliba-weather/rift-valley/ke.aspx)  
 198 [valley/ke.aspx](https://www.worldweatheronline.com/kacheliba-weather/rift-valley/ke.aspx)) for the years 2010 to 2020. The result shows overall increase in average daily

199 temperature from 23 °c in 2010 to 26 °c in 2020 (annually aggregate increase from 8169 °c in  
200 2010 to 9100 °c in 2020). Similarly, the annual kala-azar incident rates in Kacheliba sub-county  
201 hospital tends to be increasing on aggregate from approximately 400 cases to almost 500 cases.  
202 Regarding the relationship, the results shows that annual kala-azar incident rate and annual  
203 temperature trends tend to have weak positive correlation ( $r=0.609$ ;  $P=0.47$ ).

204

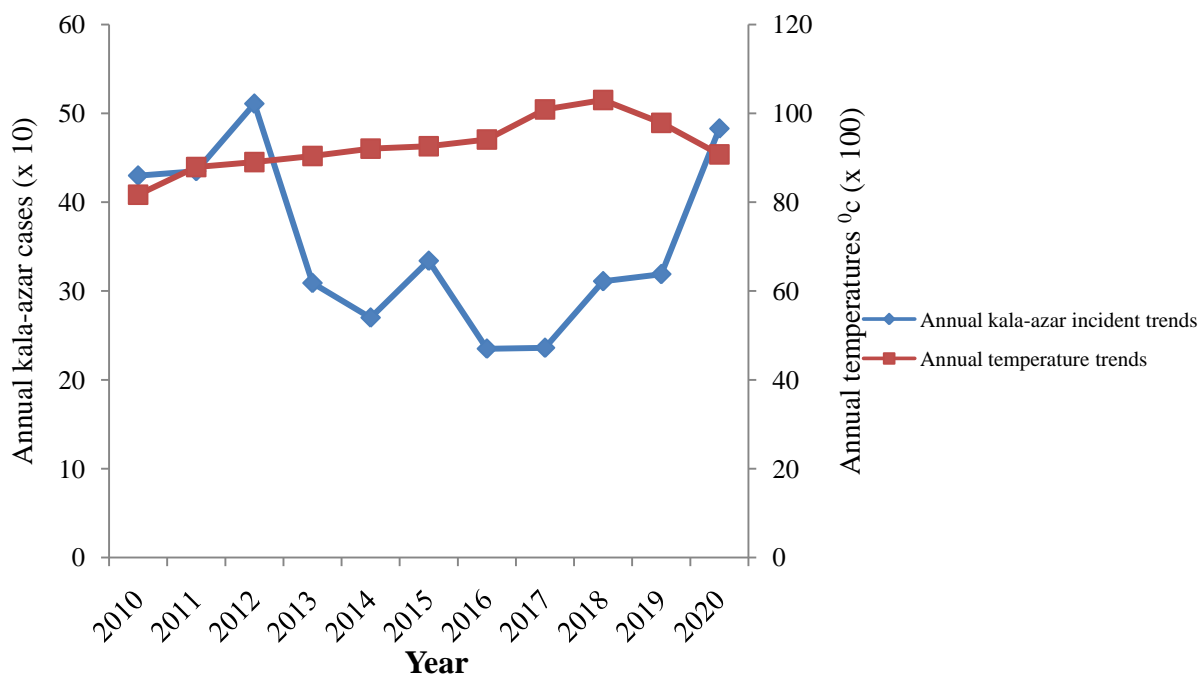

205

206 **Figure 1: Trends of kala-azar incident rates and temperature from 2010 to 2020 in**

207 **Kacheliba sub-county**

208

209 **3.4 Trends of kala-azar incident rate and rainfall amount experienced in Kacheliba sub-**  
210 **county from 2010 to 2020**

211 The result in figure 2 depicts the level at which the amount of rainfall received in Kacheliba sub-

212 county had been diminishing over the last ten years from 2010 to 2020 as obtained from world

213 weather online (<https://www.worldweatheronline.com/kacheliba-weather/rift-valley/ke.aspx>).

214 The result indicates the overall annual rainfall amount in Kacheliba sub-county had reduced from

215 3643 mm in 2010 to 2976 mm in 2020, while the aggregate annual kala-azar incident rates over

216 this decade increased from about 400 to approximately 500 cases annually. Precipitation in

217 Kacheliba sub-county tends to have significant negative correlation with annual kala-azar

218 incident rates ( $r = -0.7$ ;  $P = 0.016$ ).

219

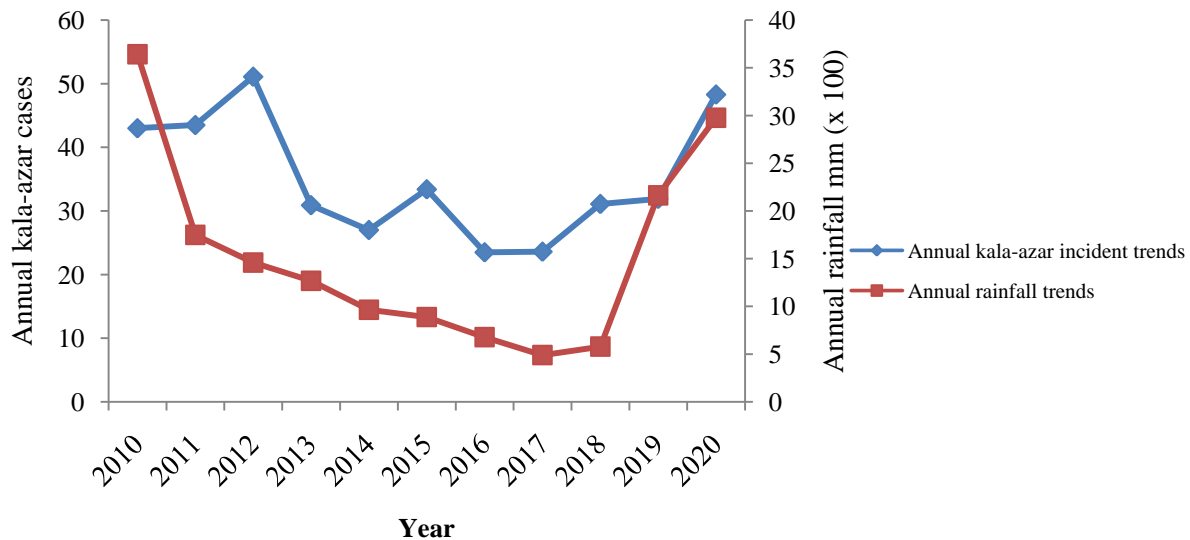

220

221 **Figure 2: Trends of kala-azar incident rates and rainfall in Kacheliba sub-county from**

222 **2010 to 2020**

223

### 224 3.4 Seasonal variation of visceral leishmaniasis incidents in Kacheliba sub-county

225 Figure 3 shows the number of visceral leishmaniasis cases treated at Kacheliba hospital per

226 month during the last half a decade from 2016 to 2020 years as obtained from Kacheliba sub-

227 county hospital records. According to the hospital records, cases have been increasing from

228 approximately three hundred in 2016 to slightly under five hundred in 2020. Visceral

229 leishmaniasis cases per month ranged between twenty and approximately thirty during this half a  
230 decade. Concerning seasonal influence, visceral leishmaniasis incidence tend to be high during  
231 end of first quarter around March and April as well as start of last quarter around October and  
232 November every year, while cases remain relatively low during middle quarter of the years.  
233

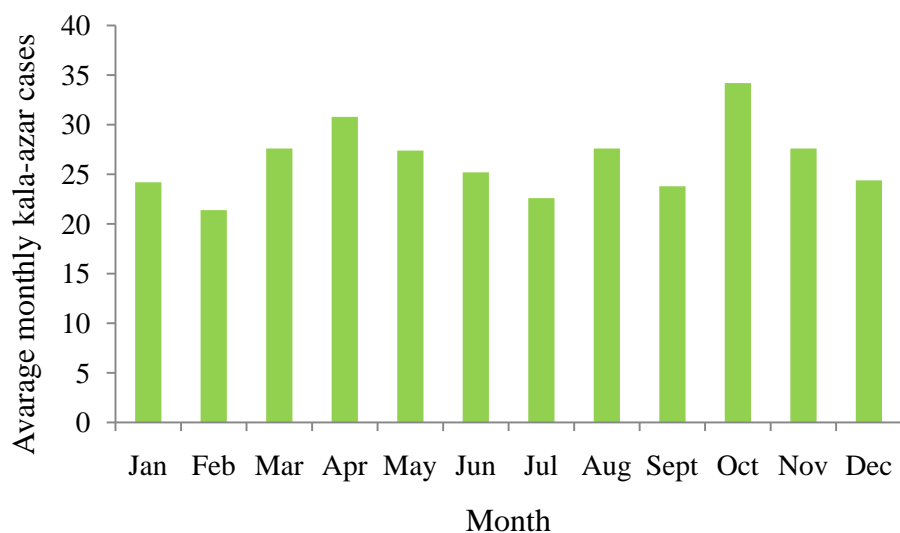

234  
235 **Figure 3: Seasonal variations of kala-azar incident rates from 2016 to 2020as obtained**  
236 **from Kacheliba sub-county hospital records**

237  
238 **4. Discussion**

239 Visceral leishmaniasis is endemic in Kacheliba sub-county and remains to be the second most  
240 prevalent parasitic disease after malaria, and these findings agree with previous reports [3,7]. The  
241 present findings point out a multiplex relationship between kala-azar incidents and climate  
242 change, as an increase in temperatures and decrease in rainfall amount remain significant  
243 predictors of kala-azar incident rate in Kacheliba from 2010 to 2020. Moreover, the observed  
244 surges in kala-azar incident rates during dry season as well as just after the rains while remaining

245 relatively low during cold weather winter season depicts the level of interaction between climate  
246 change-induced seasonal weather variability and their impact on kala-azar. The increase in kala-  
247 azar cases during the dry period is further attributed to elevated vector population as well as  
248 vector expansion to uncommon areas towards the end of dry seasons which is usually  
249 characterized by high humidity and wider temperature variations, and these findings support  
250 previous reports [21,27]. Similarly, climate change induced-prolonged customary drought  
251 conditions result in depletion of pasture coverage and triggers mass movement of humans and  
252 animals into deeper virgin high vector density rangeland sections in search of pasture and  
253 browsing content for their livestock which in the process exposes people to vector bite, and these  
254 findings support previous reports [28–31].

255 The significantly associated environmental factors; existence of seasonal rain water channels,  
256 presence of acacia tree, garbage dumping sites and anthills in and around human houses with  
257 high kala-azar infection rates may indicate the complexity of factors predisposing the  
258 communities to disease. Ever green big trees on the seasonal riverbanks provide shades from  
259 scotching sun to both herders and their livestock during dry period, likewise these trees as well  
260 as riverbank fissure and crevices form humid vector preferred hiding and breeding zones, hence  
261 providing risky areas of interaction [32,2,18]. Moreover, during flooding period these seasonal  
262 rain water pathways tend to move the sand fly larvae from the endemic zones to a new different  
263 places, hence increasing risk of transmission as well as vector expansion to new areas [33]. Due  
264 to the presence of disposed organic waste content among other characteristics, garbage dumping  
265 sites are frequented by reservoirs like rodents and disease transmitting vectors including sand fly,  
266 thus, their presence around homesteads attract and harbour the vector in the endemic areas  
267 [35,34]. The moderately humid atmosphere and plenty of hiding areas inside the anthill holes is

268 believed to form perfect resting and breeding environment for the sand fly, thus, its presences  
269 around the human houses increases risk of infections [36,2]. The flowers and secretions of the  
270 acacia tree provide both feed and water to the sand fly, while it's bark provides perfect resting  
271 and breeding place, hence presence of acacia in and around the compound poses risk of attracting  
272 the vector and exposing those living nearby [37,36,2].

273 Presence of animal sheds and chicken shelter as well as movement of houses from time to time  
274 to new temporary compounds and locations was associated with risk of visceral leishmaniasis  
275 infection, and this pose complication in disease control as these practices are cultural in nature  
276 for these communities. Many times animal and chicken shelters tend to be wet long after rains,  
277 thus, creating moisture and humidity that are believed to attract the vector while the structure  
278 provides resting spaces [38,39]. Traditional nomadic style of frequently moving houses and  
279 people to new compounds which is commonly practiced by the pastoral community living in the  
280 vector endemic arid and semi-arid areas is associated with high risk of infection. The risk is  
281 believed to be arising from the high vegetation density in the newly settled temporary compound  
282 which may be already invested with the vector or attract it as a result of human activities such as  
283 newly cultivated agricultural fields [40,41,30]. Our data is inconsistent with our earlier report by  
284 Macharia (2018) in Baringo, Kenya in which the community could not associate risk of kala-azar  
285 infection and environmental factors [42]. Interestingly, this may possibly exemplify the poor risk  
286 perception of the pastoral community on environmental associated risk factors of kala-azar  
287 infection. The limitations of present study remain to be those of cross-sectional and retrospective  
288 studies as data on household kala-azar incident rate and environmental risk factors were  
289 simultaneously assessed, as well as gaps of facility records data. In conclusion, the impact of  
290 environmental factors and climate change-induced seasonal weather pattern variability emerges

291 as important determinant of vector distribution and habitats as well as increasing level of kala-  
292 azar burden in study area. The study recommends improvement in community risk perception,  
293 introduction of culturally acceptable behavior and habitat change, and reducing vector harboring  
294 structures around houses while observing environmental conservation to mitigate impact of  
295 climate change on kala-azar.

296

297 **Ethical consideration:** This study obtained approval from Kenyatta university ethical review  
298 committee [PKU/2067/I1214]. Clearance was obtained from West Pokot County department of  
299 health and informed consent sought from research participants.

300

301 **Data availability:** All data collected and analyzed for this study are included in the article.

302

303 **Conflict of interest:** Authors declare that they have no conflict of interest.

304

305 **Funding:** This work received support from National research fund (NRF) Kenya through a  
306 multidisciplinary research grant to Kenyatta University [KU-NRF-KENYA-2016] awarded to  
307 Prof. Michael Gicheru. Funding URL, <https://researchfund.go.ke>

308

309 **Acknowledgments:** The study acknowledges the residents of West Pokot county for their study  
310 participation, and community health volunteer Isaac Nyeris for his assistance in data collection.  
311 Kacheliba hospital medical superintendent Mr. Solomon Tukey and hospital administrator Ms.



312 Melap Nakuya are credited for their support, as well as West Pokot county department of health  
313 for the research approval.

314

## 315 REFERENCES

316 1. Article R, Mohammadbeigi A, Khazaei S, Heidari H, Asgarian A, Arsangjang S, et al. An  
317 investigation of the effects of environmental and ecologic factors on cutaneous leishmaniasis in  
318 the old world : a systematic review study. 2021;36(1):117–28.

319 2. Id FS, Khan F, Kabir R. Awareness of residents about kala-azar and its related practices in two  
320 endemic areas of. 2019;1–15.

321 3. WHO. World Health Statistics [Internet]. 2014. 180 p. Available from:  
322 [https://apps.who.int/iris/bitstream/handle/10665/112738/9789240692671\\_eng.pdf;jsessionid=DA](https://apps.who.int/iris/bitstream/handle/10665/112738/9789240692671_eng.pdf;jsessionid=DA95619A41595349F3EBAE81DAC83526?sequence=1)  
323 [95619A41595349F3EBAE81DAC83526?sequence=1](https://apps.who.int/iris/bitstream/handle/10665/112738/9789240692671_eng.pdf;jsessionid=DA95619A41595349F3EBAE81DAC83526?sequence=1)

324 4. WHO. LEISHMANIASIS [Internet]. 2021. Available from: [https://www.who.int/news-](https://www.who.int/news-room/fact-sheets/detail/leishmaniasis)  
325 [room/fact-sheets/detail/leishmaniasis](https://www.who.int/news-room/fact-sheets/detail/leishmaniasis)

326 5. GOK-MOH. The Strategic Plan for Control of Leishmaniasis 2021-2025. Moh 2021 [Internet].  
327 2021;12(3):351–76. Available from:  
328 <https://doi.org/10.1016/j.phrs.2020.104743><https://doi.org/10.1057/s41267-019-00222-y>

329 6. Mutiso JM, Macharia JC, Kii MN, Ichagichua JM, Rikoi H, Gicherub MM. Development of  
330 leishmania vaccines: Predicting the future from past and present experience. J Biomed Res.  
331 2013;27(2):85–102.

332

- 333 7. Song Y, Zhang T, Li H, Wang K, Lu X. Mathematical Model Analysis and Simulation of  
334 Visceral Leishmaniasis, Kashgar, Xinjiang, 2004-2016. *Complexity*. 2020;2020.
- 335 8. Haftom M, Petrucka P, Gemechu K, Nesro J, Amare E, Hailu T, et al. Prevalence and Risk  
336 Factors of Human Leishmaniasis in Ethiopia: A Systematic Review and Meta-Analysis. *Infect*  
337 *Dis Ther* [Internet]. 2021;10(1):47–60. Available from: [https://doi.org/10.1007/s40121-020-](https://doi.org/10.1007/s40121-020-00361-y)  
338 00361-y
- 339 9. Cloots K, Uranw S, Ostyn B, Bhattarai NR, Le Rutte E, Khanal B, et al. Impact of the visceral  
340 leishmaniasis elimination initiative on *Leishmania donovani* transmission in Nepal: a 10-year  
341 repeat survey. *Lancet Glob Heal* [Internet]. 2020;8(2):e237–43. Available from:  
342 [http://dx.doi.org/10.1016/S2214-109X\(19\)30536-4](http://dx.doi.org/10.1016/S2214-109X(19)30536-4)
- 343 10. Bañuls AL, Hide M, Prugnolle F. *Leishmania* and the Leishmaniases: A Parasite Genetic  
344 Update and Advances in Taxonomy, Epidemiology and Pathogenicity in Humans. *Adv Parasitol*.  
345 2007;64.
- 346 11. Malaria Consortium. Leishmaniasis control in eastern Africa: Past and present efforts and  
347 future needs. *Situation and gap analysis*. 2010;(November):87.
- 348 12. Alvar J, Vélez ID, Bern C, Herrero M, Desjeux P, Cano J, et al. Leishmaniasis worldwide  
349 and global estimates of its incidence. *PLoS One*. 2012;7(5).
- 350 13. Tinui W. Situational Analysis of *Leishmaniases* Research in Kenya. *Afr J Health Sci*.  
351 2008;13(1):7–21.
- 352

- 353 14. Kenya Ministry of Health. Prevention, diagnosis and treatment of visceral leishmaniasis  
354 (kala-azar) in Kenya: national guidelines for health workers. 2017;1–63. Available from:  
355 [https://www.who.int/leishmaniasis/burden/Kala\\_Azar\\_Kenya\\_2017.pdf?ua=1](https://www.who.int/leishmaniasis/burden/Kala_Azar_Kenya_2017.pdf?ua=1)
- 356 15. WHO. WHO responds to visceral leishmaniasis outbreak in Kenya [Internet]. 2017.  
357 Available from: [https://www.who.int/news/item/23-06-2017-who-responds-to-visceral-](https://www.who.int/news/item/23-06-2017-who-responds-to-visceral-leishmaniasis-outbreak-in-kenya)  
358 [leishmaniasis-outbreak-in-kenya](https://www.who.int/news/item/23-06-2017-who-responds-to-visceral-leishmaniasis-outbreak-in-kenya)
- 359 16. Tidman R, Abela-Ridder B, De Castañeda RR. The impact of climate change on neglected  
360 tropical diseases: A systematic review. *Trans R Soc Trop Med Hyg.* 2021;115(2):147–68.
- 361 17. Short EE, Caminade C, Thomas BN. Climate Change Contribution to the Emergence or Re-  
362 Emergence of Parasitic Diseases. *Infect Dis Res Treat.* 2017;10:117863361773229.
- 363 18. Valero NNH, Uriarte M. Environmental and socioeconomic risk factors associated with  
364 visceral and cutaneous leishmaniasis: a systematic review. *Parasitol Res.* 2020;119(2):365–84.
- 365 19. Li Y, Zheng C. Associations between Meteorological Factors and Visceral Leishmaniasis  
366 Outbreaks in Jiashi County , Xinjiang Uygur Autonomous Region ,. 2019;
- 367 20. Githeko AK, Lindsay SW, Confalonieri UE, Patz JA. Climate change and vector-borne  
368 diseases: A regional analysis. *Bull World Health Organ.* 2000;78(9):1136–47.
- 369 21. El Omari H, Chahlaoui A, Talbi FZ, Mouhdi KEL, El Ouali Lalami A. Impact of Climatic  
370 Factors on the Seasonal Fluctuation of Leishmaniasis Vectors in Central Morocco (Meknes  
371 Prefecture). *Can J Infect Dis Med Microbiol.* 2020;2020.
- 372

- 373 22. Carvalho SFG, Vieira TM, Moura APV, Andrade MC. Should an intersection between  
374 visceral leishmaniasis endemicity and the COVID-19 pandemic be considered? *Med Hypotheses*  
375 [Internet]. 2020;144(September):110289. Available from:  
376 <https://doi.org/10.1016/j.mehy.2020.110289>
- 377 23. Jones CM, Welburn SC. Leishmaniasis Beyond East Africa. *Front Vet Sci.*  
378 2021;8(February):1–10.
- 379 24. Le Rutte EA, Coffeng LE, Munoz J, De Vlas SJ. Modelling the impact of COVID-19-related  
380 programme interruptions on visceral leishmaniasis in India. *Trans R Soc Trop Med Hyg.*  
381 2021;115(3):229–35.
- 382 25. Kenya National Bureau of Statistics. Kenya population and housing census volume 1:  
383 Population by County and sub-County [Internet]. Vol. I, Kenya National Bureau of Statistics.  
384 2019. 1–38 p. Available from: [https://www.knbs.or.ke/?wpdmpro=2019-kenya-population-and-](https://www.knbs.or.ke/?wpdmpro=2019-kenya-population-and-housing-census-volume-i-population-by-county-and-sub-county)  
385 [housing-census-volume-i-population-by-county-and-sub-county](https://www.knbs.or.ke/?wpdmpro=2019-kenya-population-and-housing-census-volume-i-population-by-county-and-sub-county)
- 386 26. Kacheliba Weather Forecast | Rift Valley, KE [Internet]. [cited 2022 Mar 5]. Available from:  
387 <https://www.worldweatheronline.com/kacheliba-weather/rift-valley/ke.aspx>
- 388 27. Gebresilassie A, Kirstein OD, Yared S, Aklilu E, Moncaz A, Tekie H, et al. Species  
389 composition of phlebotomine sand flies and bionomics of *Phlebotomus orientalis* (Diptera:  
390 Psychodidae) in an endemic focus of visceral leishmaniasis in Tahtay Adiyabo district, Northern  
391 Ethiopia. *Parasites and Vectors* [Internet]. 2015;8(1):1–12. Available from: ???
- 392

- 393 28. Quinnell RJ, Courtenay O, Garcez L, Dye C. The epidemiology of canine leishmaniasis:  
394 Transmission rates estimated from a cohort study in Amazonian Brazil. *Parasitology*.  
395 1997;115(2):143–56.
- 396 29. Koirala S, Karki P, Das ML, Parija SC, Karki BMS. Epidemiological study of kala-azar by  
397 direct agglutination test in two rural communities of eastern Nepal. *Trop Med Int Heal*.  
398 2004;9(4):533–7.
- 399 30. Yared S, Deribe K, Gebreselassie A, Lemma W, Akililu E, Kirstein OD, et al. Risk factors of  
400 visceral leishmaniasis: A case control study in north-western Ethiopia. *Parasites and Vectors*.  
401 2014;7(1):1–11.
- 402 31. Ali Mohammed Al-Selwi A. Geographical Distribution of Visceral Leishmaniasis Among  
403 Children in Dhamar Governorate, Yemen. *J Heal Environ Res*. 2018;4(1):16.
- 404 32. Moncaz A, Kirstein O, Gebresellassie A, Lemma W, Yared S, Gebre-Michael T, et al.  
405 Characterization of breeding sites of *Phlebotomus orientalis* - The vector of visceral  
406 leishmaniasis in northwestern Ethiopia. *Acta Trop* [Internet]. 2014;139:5–14. Available from:  
407 <http://dx.doi.org/10.1016/j.actatropica.2014.06.013>
- 408 33. Rajesh K, Sanjay K. Change in global Climate and Prevalence of Visceral Leishmaniasis. *Int*  
409 *J Sci Res Publ*. 2013;3(1):2250–3153.
- 410 34. Chelbi I, Mathlouthi O, Zhioua S, Fares W, Boujaama A, Cherni S, et al. The impact of  
411 illegal waste sites on the transmission of zoonotic cutaneous leishmaniasis in central Tunisia. *Int*  
412 *J Environ Res Public Health*. 2021;18(1):1–10.

413

- 414 35. Iliopoulou P, Tsatsaris A, Katsios I, Panagiotopoulou A, Romaliades S, Papadopoulos B, et  
415 al. Risk mapping of visceral leishmaniasis: A spatial regression model for Attica region, Greece.  
416 *Trop Med Infect Dis.* 2018;3(3).
- 417 36. Alebie G, Worku A, Yohannes S, Urga B, Hailu A, Tadesse D. Epidemiology of visceral  
418 leishmaniasis in Shebelle Zone of Somali Region, eastern Ethiopia. *Parasites and Vectors*  
419 [Internet]. 2019;12(1):1–10. Available from: <https://doi.org/10.1186/s13071-019-3452-5>
- 420 37. Argaw D, Mulugeta A, Herrero M, Nombela N, Teklu T, Tefera T, et al. Risk factors for  
421 visceral Leishmaniasis among residents and migrants in Kafta-Humera, Ethiopia. *PLoS Negl*  
422 *Trop Dis.* 2013;7(11):e2543.
- 423 38. Younis LG, Kroeger A, Joshi AB, Das ML, Omer M, Singhid VK, et al. Housing structure  
424 including the surrounding environment as a risk factor for visceral leishmaniasis transmission in  
425 Nepal. *PLoS Negl Trop Dis* [Internet]. 2020;14(3):1–13. Available from:  
426 <http://dx.doi.org/10.1371/journal.pntd.0008132>
- 427 39. Oliveira-Sena I V., Werneck GL. Risk factors for in-hospital mortality from visceral  
428 leishmaniasis: A case-control study. *J Infect Public Health* [Internet]. 2020;13(4):538–43.  
429 Available from: <https://doi.org/10.1016/j.jiph.2019.10.003>
- 430 40. Belo VS, Werneck GL, Barbosa DS, Simões TC, Nascimento BWL, da Silva ES, et al.  
431 Factors Associated with Visceral Leishmaniasis in the Americas: A Systematic Review and  
432 Meta-Analysis. *PLoS Negl Trop Dis.* 2013;7(4).
- 433

434 41. Gadisa E, Tsegaw T, Abera A, Elnaiem DE, Den Boer M, Aseffa A, et al. Eco-epidemiology  
435 of visceral leishmaniasis in Ethiopia. *Parasites and Vectors* [Internet]. 2015;8(1):1–10. Available  
436 from: <http://dx.doi.org/10.1186/s13071-015-0987-y>

437 42. Macharia JC, Mutiso JM, Gicheru MM, Ogwayo IO, Ngatiri GG. Kala-Azar And The  
438 Associated Factors Influencing Health Care Seeking Among The Residents Of Baringo.  
439 2018;4(7).

440
